# Supplementary material for: Outcome of allogeneic transplantation for mature T-cell lymphomas: impact of donor source and disease characteristics
Source: PubMed Central journal article supplement — Blood Adv. 2022 Feb 2;6(3):920–30. doi: 10.1182/bloodadvances.2021005899 (PMC8945300; doi:10.1182/bloodadvances.2021005899), 2022-02-02

## Supplementary Appendix

### Table of Contents

|                                                                                                                   |   |
|-------------------------------------------------------------------------------------------------------------------|---|
| Supplemental Table 1: Baseline characteristics of patients with data available on prior therapy lines.....        | 2 |
| Supplemental Table 2: Univariate outcomes of patients based on prior therapy lines .....                          | 3 |
| Supplemental Table 3: Impact of lines of prior to allogeneic transplant on outcomes (multivariate analysis) ..... | 4 |
| Supplemental Table 4: Cause of Death.....                                                                         | 5 |
| Supplemental Figure 1: Hematopoietic recovery.....                                                                | 6 |

Supplemental Table 1: Baseline characteristics of patients with data available on prior therapy lines

|                               |                     | 1 Prior therapy line            | 2 Prior therapy lines         | 3 and more Prior therapy lines | Test p-value |
|-------------------------------|---------------------|---------------------------------|-------------------------------|--------------------------------|--------------|
| <b>Number of patients</b>     |                     | 196                             | 250                           | 319                            |              |
| <b>Age</b>                    | median (range)[IQR] | 54.2 (18.2-71.9)<br>[44.9-59.8] | 51.5 (18.2-75.6)<br>[41.1-59] | 51.4 (19-71.9)<br>[42-59]      | 0.18         |
| <b>Gender</b>                 | Female              | 59 (30.1)                       | 82 (32.8)                     | 107 (33.5)                     | 0.71         |
|                               | Male                | 137 (69.9)                      | 168 (67.2)                    | 212 (66.5)                     |              |
| <b>KPS</b>                    | <90                 | 49 (26.2)                       | 72 (30.3)                     | 108 (34.8)                     | 0.12         |
|                               | >=90                | 138 (73.8)                      | 166 (69.7)                    | 202 (65.2)                     |              |
|                               | missing             | 9                               | 12                            | 9                              |              |
| <b>Cell source</b>            | Bone marrow         | 20 (10.2)                       | 24 (9.6)                      | 41 (12.9)                      | 0.42         |
|                               | Peripheral blood    | 176 (89.8)                      | 226 (90.4)                    | 278 (87.1)                     |              |
| <b>Conditioning intensity</b> | Myeloablative       | 52 (26.7)                       | 82 (33.3)                     | 129 (40.8)                     | 0.004        |
|                               | RIC                 | 143 (73.3)                      | 164 (66.7)                    | 187 (59.2)                     |              |
|                               | missing             | 1                               | 4                             | 3                              |              |
| <b>Disease status</b>         | CR                  | 129 (67.9)                      | 145 (58.7)                    | 159 (52.3)                     | 0.004        |
|                               | PR                  | 43 (22.6)                       | 71 (28.7)                     | 87 (28.6)                      |              |
|                               | Resistant/Untreated | 18 (9.5)                        | 31 (12.6)                     | 58 (19.1)                      |              |
|                               | missing             | 6                               | 3                             | 15                             |              |
| <b>Comorbidity score</b>      | 0                   | 72 (50.3)                       | 89 (52)                       | 123 (53.7)                     | 0.34         |
|                               | [1-2]               | 38 (26.6)                       | 34 (19.9)                     | 41 (17.9)                      |              |
|                               | >2                  | 33 (23.1)                       | 48 (28.1)                     | 65 (28.4)                      |              |
|                               | missing             | 53                              | 79                            | 90                             |              |
| <b>Histology</b>              | AITL                | 70 (35.7)                       | 76 (30.4)                     | 96 (30.1)                      | 0.06         |
|                               | ALCL                | 37 (18.9)                       | 53 (21.2)                     | 92 (28.8)                      |              |
|                               | PTCL                | 89 (45.4)                       | 121 (48.4)                    | 131 (41.1)                     |              |
| <b>Survival Status</b>        | Alive               | 147 (75)                        | 170 (68)                      | 199 (62.4)                     | 0.01         |
|                               | Dead                | 49 (25)                         | 80 (32)                       | 120 (37.6)                     |              |

**Abbreviations:** AITL=angioimmunoblastic T-cell lymphoma, ALCL=anaplastic large cell lymphoma, Haplo=haploidentical, IQR= interquartile range, KPS=Karnofsky performance score, PTCL=peripheral T-cell lymphoma.

Supplemental Table 2: Univariate outcomes of patients based on prior therapy lines

|                   |                 | Overall Survival | Progression-free Survival | Relapse/Progression | Non relapse mortality |
|-------------------|-----------------|------------------|---------------------------|---------------------|-----------------------|
| <b>At 1 year</b>  | <b>1 Line</b>   | 79.3%[72.6-84.5] | 65.2%[57.8-71.6]          | 22.3%[16.5-28.5]    | 12.5%[8.2-17.8]       |
|                   | <b>2 Lines</b>  | 76.1%[70-81.1]   | 68%[61.6-73.5]            | 15.5%[11.2-20.4]    | 16.6%[12.1-21.6]      |
|                   | <b>3+ Lines</b> | 70.2%[64.7-75]   | 58.8%[53-64.2]            | 24%[19.3-28.9]      | 17.2%[13.2-21.7]      |
|                   | <b>P value</b>  | 0.01             | 0.009                     | 0.1                 | 0.08                  |
| <b>At 3 years</b> | <b>1 Line</b>   | 73.3%[65.6-79.6] | 58.9%[50.9-66]            | 26.9%[20.4-33.7]    | 14.3%[9.5-20]         |
|                   | <b>2 Lines</b>  | 64.2%[56.5-70.9] | 52.9%[45.1-60]            | 23.8%[17.9-30.3]    | 23.3%[17.4-29.6]      |
|                   | <b>3+ Lines</b> | 59%[52.5-65]     | 46.4%[40-52.5]            | 30.7%[25.3-36.2]    | 22.9%[17.8-28.4]      |
|                   | <b>P value</b>  | 0.01             | 0.01                      | 0.1                 | 0.08                  |

Supplemental Table 3: Impact of lines of prior to allogeneic transplant on outcomes (multivariate analysis)

|                                                                                                                                                                          | Reference group | Overall Survival                                                                               |             | Progression-free Survival                                                                                    |         | Relapse/progression                                                                                              |         | Non-relapse mortality                                                   |             |
|--------------------------------------------------------------------------------------------------------------------------------------------------------------------------|-----------------|------------------------------------------------------------------------------------------------|-------------|--------------------------------------------------------------------------------------------------------------|---------|------------------------------------------------------------------------------------------------------------------|---------|-------------------------------------------------------------------------|-------------|
|                                                                                                                                                                          |                 | Hazard ratio (95%CI)                                                                           | p.value     | Hazard ratio (95%CI)                                                                                         | p.value | Hazard ratio (95%CI)                                                                                             | p.value | Hazard ratio (95%CI)                                                    | p.value     |
| <b>Number of pre alloHCT lines of therapy</b>                                                                                                                            |                 |                                                                                                |             |                                                                                                              |         |                                                                                                                  |         |                                                                         |             |
| <b>2 line</b>                                                                                                                                                            | <b>1 line</b>   | 1.4 (1.0-2.1)                                                                                  | 0.07        | 1.1 (0.8-1.5)                                                                                                | 0.49    | 0.8 (0.5-1.2)                                                                                                    | 0.30    | 1.8 (1.1-3.0)                                                           | <b>0.02</b> |
| <b>3 and more</b>                                                                                                                                                        |                 | 1.6 (1.1-2.2)                                                                                  | <b>0.02</b> | 1.3 (1.0-1.8)                                                                                                | 0.06    | 1.1 (0.8-1.6)                                                                                                    | 0.59    | 1.8 (1.1-2.9)                                                           | <b>0.02</b> |
|                                                                                                                                                                          |                 | Analysis adjusted for donor source, remission status, patient age, gender and KPS <sup>1</sup> |             | Analysis adjusted for remission status, patient age, gender and history of prior autologous HCT <sup>1</sup> |         | Analysis adjusted for remission status, history of prior autologous HCT, KPS and lymphoma histology <sup>1</sup> |         | Analysis adjusted for donor source, patient age and gender <sup>1</sup> |             |
| <sup>1</sup> These indicate covariates that were independently predictive of overall survival, progression-free survival, relapse/progression and non-relapse mortality. |                 |                                                                                                |             |                                                                                                              |         |                                                                                                                  |         |                                                                         |             |

## Supplemental Table 4: Cause of Death

|                                   | Total    | Haploidentical donor | HLA identical sibling | MUD TCD+ | MUD TCD- |
|-----------------------------------|----------|----------------------|-----------------------|----------|----------|
| <b>No. of deaths</b>              | 739      | 87                   | 344                   | 185      | 123      |
| Primary disease                   | 238 (34) | 32 (38)              | 115 (36)              | 54 (30)  | 37 (31)  |
| Organ failure                     | 77 (11)  | 16 (19)              | 30 (9)                | 17 (10)  | 14 (12)  |
| Infection(s)                      | 135 (19) | 17 (20)              | 56 (17)               | 39 (22)  | 23 (19)  |
| GVHD                              | 113 (16) | 7 (8)                | 46 (14)               | 34 (19)  | 26 (22)  |
| Second malignancy                 | 13 (2)   | 1 (1)                | 6 (2)                 | 6 (3)    | 0 (0)    |
| ARDS                              | 5 (1)    | 0 (0)                | 4 (1)                 | 1 (1)    | 0 (0)    |
| Graft rejection                   | 4 (1)    | 1 (1)                | 1 (0)                 | 2 (1)    | 0 (0)    |
| Hemorrhage                        | 8 (1)    | 0 (0)                | 4 (1)                 | 3 (2)    | 1 (1)    |
| Accidental death                  | 2 (0)    | 0 (0)                | 1 (0)                 | 0 (0)    | 1 (1)    |
| Other transplant related cause(s) | 90 (13)  | 10 (12)              | 49 (15)               | 17 (10)  | 14 (12)  |
| Other                             | 15 (2)   | 0 (0)                | 9 (3)                 | 4 (2)    | 2 (2)    |
| Missing                           | 39       | 3                    | 23                    | 8        | 5        |

Abbreviations: ARDS=Acute respiratory distress syndrome; GVHD=graft-versus-host disease

## Supplemental Figure 1: Hematopoietic recovery.

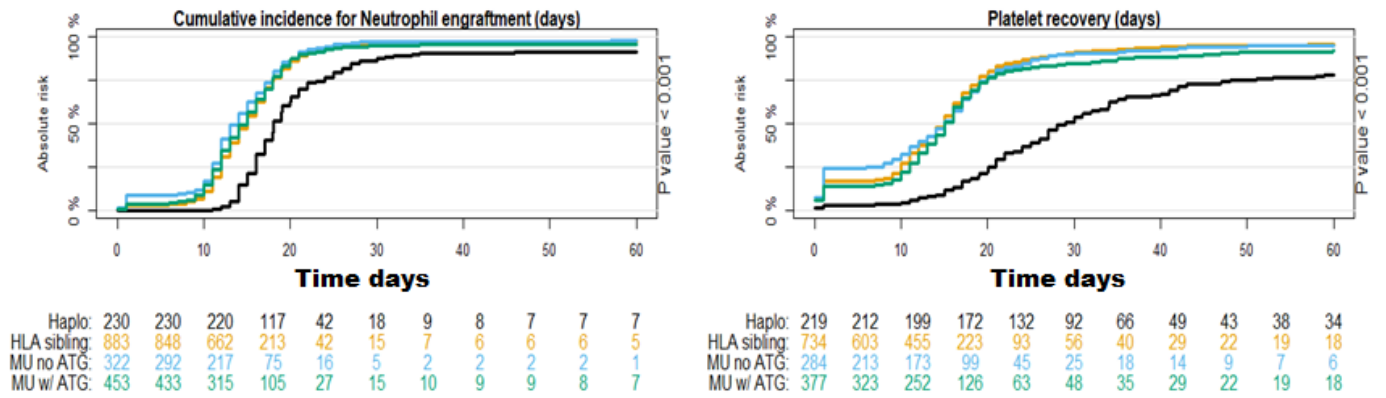

Supplement: advancesADV2021005899-suppl1.pdf [file advancesADV2021005899-suppl1.pdf]
